# Supplementary material for: A Method for the Preparation of Chicken Liver Pâté that Reliably Destroys Campylobacters
Source: PubMed Central journal article supplement (PMC4454932; doi:10.3390/ijerph120504652), 2015-04-28
Supplement: ijerph-12-04652-s001.pdf [file ijerph-12-04652-s001.pdf]

## A Method for the Preparation of Chicken Liver Pâté that Reliably Destroys Campylobacters

An example summary of the PROMPT appraisal using the highest and lowest scored recipes

**Table S1.** A Provenance, Relevance, Objectivity, Method, Presentation and Timeliness (PROMPT) analysis of highest and lowest scored recipes.

| Recipe Source | Attribute            | PROMPT Analyses Notes                                                                                                                                                                                                                                       | PROMPT Score |
|---------------|----------------------|-------------------------------------------------------------------------------------------------------------------------------------------------------------------------------------------------------------------------------------------------------------|--------------|
| [1]           | P                    | Author not identified.                                                                                                                                                                                                                                      | 1            |
|               | R                    | Most antimicrobials in whisky/brandy and peppercorns are cooked and therefore denatured/have reduced activity before any contact with the livers.                                                                                                           | 1            |
|               | O                    | No obvious bias for the All About You website. No branded ingredients were used. No branded products for complementary foods such as the recommended accompanying wine.                                                                                     | 5            |
|               | M                    | Livers cooked until there is no blood left (5–10 min), clearly stated to not overcook them, but no reference to leave them pink in the middle.                                                                                                              | 2            |
|               | P                    | A list of all required ingredients was provided. Information regarding nutritional values included. Clearly laid out recipe-each stage was numbered. No pictures, photos or video, but the wording was descriptive enough to be easy to follow.             | 4            |
|               | T                    | Present on the website in 2012, relatively new recipe, however it does not contain anything that is new or novel.                                                                                                                                           | 1            |
|               | Average PROMPT score |                                                                                                                                                                                                                                                             |              |
| [2]           | P                    | Clearly-identified author with appropriate background/training/experience, a celebrity chef.                                                                                                                                                                | 5            |
|               | R                    | Most antimicrobials in the garlic, shallots, thyme, madeira, port and pepper are cooked and therefore denatured/have reduced activity before any contact with the livers.                                                                                   | 1            |
|               | O                    | No obvious bias for either the BBC website (which has no advertising) or Raymond Blanc. No branded ingredients were used. No branded products for complementary foods such as the recommended accompanying wine.                                            | 5            |
|               | M                    | Milk marinade will remove roughly half of the reversibly-bound campylobacters<br>Low cooking temperature of 70 °C.<br>But prolonged cooking duration of up to one hour.<br>Possible to set an objectively-measured target temperature setting for the oven. | 4            |
|               | P                    | A list of all required ingredients was provided. Clearly laid out recipe-each stage was numbered. No pictures, photos or video, but the wording was descriptive enough to be easy to follow.                                                                | 4            |
|               | T                    | No date provided for the recipe. Fairly novel use of a Bain Marie for cooking could be used to promote food safety compared with pan frying.                                                                                                                | 3            |
|               | Average PROMPT score |                                                                                                                                                                                                                                                             |              |

**Table S2.** Color changes to the surfaces of fresh chicken livers as a consequence of immersion ethanoic or lactic acids of different concentrations. <sup>a</sup> denotes the Standard Error of the Mean of six average color attribute scores. L, a, b, C and H are coordinates on a chromaticity diagram provided by the instrument manufacturer. In combination, they describe the measured color.

| Treatment        | Mean Color Component Change after Treatment ( $\pm$ SEM <sup>a</sup> ) |                  |                  |                  |                 | Overall Color Change ( $\Delta E$ <sup>a,b</sup> ) |
|------------------|------------------------------------------------------------------------|------------------|------------------|------------------|-----------------|----------------------------------------------------|
|                  | $\Delta L$ *                                                           | $\Delta a$ *     | $\Delta b$ *     | $\Delta C$ *     | $\Delta H$ *    |                                                    |
| Water rinse      | 1.13 $\pm$ 0.22                                                        | -1.11 $\pm$ 0.33 | -1.19 $\pm$ 0.25 | -1.33 $\pm$ 0.38 | 0.93 $\pm$ 0.19 | 2.16 $\pm$ 0.27                                    |
| 1% ethanoic acid | 5.24 $\pm$ 0.57                                                        | -2.64 $\pm$ 0.41 | -1.11 $\pm$ 0.50 | -2.88 $\pm$ 0.52 | 0.68 $\pm$ 0.26 | 6.15 $\pm$ 0.54                                    |
| 2% ethanoic acid | 5.62 $\pm$ 0.40                                                        | -2.43 $\pm$ 0.37 | -0.20 $\pm$ 0.20 | -2.39 $\pm$ 0.35 | 0.61 $\pm$ 0.17 | 6.17 $\pm$ 0.49                                    |
| 3% ethanoic acid | 4.64 $\pm$ 0.98                                                        | -2.61 $\pm$ 0.39 | -0.45 $\pm$ 0.20 | -2.65 $\pm$ 0.42 | 0.33 $\pm$ 0.08 | 5.37 $\pm$ 0.53                                    |
| 4% ethanoic acid | 4.51 $\pm$ 0.45                                                        | -1.98 $\pm$ 0.17 | -0.02 $\pm$ 0.31 | -1.91 $\pm$ 0.15 | 0.74 $\pm$ 0.22 | 5.00 $\pm$ 0.43                                    |
| 5% ethanoic acid | 3.19 $\pm$ 0.51                                                        | -1.11 $\pm$ 0.27 | 0.11 $\pm$ 0.20  | -1.05 $\pm$ 0.31 | 0.39 $\pm$ 0.16 | 3.44 $\pm$ 0.53                                    |
| 1% lactic acid   | 2.90 $\pm$ 0.46                                                        | -2.70 $\pm$ 0.22 | -1.85 $\pm$ 0.21 | -3.04 $\pm$ 0.25 | 1.22 $\pm$ 0.18 | 4.47 $\pm$ 0.37                                    |
| 2% lactic acid   | 3.26 $\pm$ 0.55                                                        | -1.64 $\pm$ 0.48 | -1.34 $\pm$ 0.36 | -1.94 $\pm$ 0.56 | 0.83 $\pm$ 0.24 | 4.16 $\pm$ 0.47                                    |
| 3% lactic acid   | 2.12 $\pm$ 0.30                                                        | -1.60 $\pm$ 0.38 | -0.73 $\pm$ 0.41 | -1.74 $\pm$ 0.47 | 0.73 $\pm$ 0.15 | 3.00 $\pm$ 0.35                                    |
| 4% lactic acid   | 1.97 $\pm$ 0.45                                                        | -1.78 $\pm$ 0.31 | -0.72 $\pm$ 0.41 | -1.93 $\pm$ 0.39 | 0.73 $\pm$ 0.20 | 3.10 $\pm$ 0.26                                    |
| 5% lactic acid   | 1.59 $\pm$ 0.54                                                        | -0.96 $\pm$ 0.11 | 0.10 $\pm$ 0.08  | -0.91 $\pm$ 0.12 | 0.34 $\pm$ 0.07 | 2.08 $\pm$ 0.38                                    |

**Table S3.** Tukey HSD (honest significant difference) comparisons for mean log campylobacter numbers after wash treatments.

| Treatments Compared                     | <i>p</i> -Value | Accepted? |
|-----------------------------------------|-----------------|-----------|
| Acetate then Milk vs. Acetate           | 0.091069802     | rejected  |
| Acetate then Milk vs. Control           | 7.82 E-05       | accepted  |
| Acetate then Milk vs. Lactate then Milk | 0.999601351     | rejected  |
| Acetate then Milk vs. Lactate           | 0.004568831     | accepted  |
| Acetate then Milk vs. Milk              | 7.82 E-05       | accepted  |
| Acetate then Milk vs. Water             | 7.82 E-05       | accepted  |
| Acetate then Milk vs. Water then Milk   | 0.9803316       | rejected  |
| Acetate vs. Control                     | 7.82 E-05       | accepted  |
| Acetate vs. Lactate then Milk           | 0.243388561     | rejected  |
| Acetate vs. Lactate                     | 0.921310888     | rejected  |
| Acetate vs. Milk                        | 7.82 E-05       | accepted  |
| Acetate vs. Water                       | 7.82 E-05       | accepted  |
| Acetate vs. Water then Milk             | 0.009639691     | accepted  |
| Control vs. Lactate then Milk           | 7.82 E-05       | accepted  |
| Control vs. Lactate                     | 7.82 E-05       | accepted  |
| Control vs. Milk                        | 0.999989867     | rejected  |
| Control vs. Water                       | 0.855752344     | rejected  |
| Control vs. Water then Milk             | 7.82 E-05       | accepted  |
| Lactate then Milk vs. Lactate           | 0.016849546     | accepted  |
| Lactate then Milk vs. Milk              | 7.82 E-05       | accepted  |
| Lactate then Milk vs. Water             | 7.82 E-05       | accepted  |

## **References**

1. All about You, Smooth Chicken Liver Pate. Available online: <http://www.allaboutyou.com/food/recipefinder/smooth-chicken-liver-pate-recipe-55329> (accessed on 17 March 2015).
2. Chicken Liver Parfait, Raymond Blanc's Kitchen Secrets. Available online: [http://www.bbc.co.uk/food/recipes/chicken\\_liver\\_parfait\\_53623](http://www.bbc.co.uk/food/recipes/chicken_liver_parfait_53623) (accessed on 17 March 2015).

© 2015 by the authors; licensee MDPI, Basel, Switzerland. This article is an open access article distributed under the terms and conditions of the Creative Commons Attribution license (<http://creativecommons.org/licenses/by/4.0/>).
